# Supplementary material for: Trait Values, Not Trait Plasticity, Best Explain Invasive Species' Performance in a Changing Environment
Source: PLoS One. 2012 Oct 31;7(10):e48821. doi: 10.1371/journal.pone.0048821 (PMC3485323; doi:10.1371/journal.pone.0048821)
Supplement: Table S2 — Relative trait range values (plasticity indices) for functional traits by species. (XLS) [file pone.0048821.s002.xls]

## Sheet: Sheet1
Species	LMR	RMR	SMR	LAR	SLA	DMF	Narea	Parea	chl a/b ratio	chl area	protein area	Amass	Aarea	gs	PNUE	WUE	SAR-N	SAR-P	RGR
P. banksiana	0.11476	-0.229814	0.134876	-0.047929	-0.15726	-0.179209	0.401344	0.119897	0.026408	0.625641	0.567084	0.648806	0.704035	0.730895	0.505617	0.129673	0.806536	0.533751	0.571897
P. cembra	0.133563	-0.154184	-0.001064	0.135369	0.002578	-0.037771	0.310472	0.169225	-0.215524	-0.265705	0.307596	0.217486	-0.219503	-0.204426	-0.461825	-0.068429	0.94333	-0.469365	0.059269
P. flexilis	0.162365	-0.181383	0.074176	0.163699	0.014467	-0.047996	0.174371	-0.457194	-0.049958	0.087353	-0.518453	0.243926	0.232827	0.210082	0.070802	-0.228945	0.903061	0.367937	0.199865
P. halepensis	0.134162	-0.353524	0.109718	0.331362	0.242592	-0.23192	0.413204	-0.45641	0.037081	0.702776	-0.123814	0.306274	0.084079	-0.170787	-0.359337	-0.061747	0.933785	0.717144	0.350728
P. lambertiana	0.142684	-0.176703	-0.010033	0.155915	0.015068	-0.276793	0.360877	0.15111	0.046989	0.590195	0.715141	0.184458	0.171982	0.175605	-0.228129	0.253678	0.942841	0.533657	0.20994
P. muricata	0.107626	-0.198276	0.14593	0.093911	0.000981	-0.309975	0.497564	0.208815	0.240039	0.365132	0.485761	0.323467	0.322803	0.461308	-0.258065	0.480673	0.694244	0.691113	0.547756
P. pinaster	0.114192	-0.197364	0.111531	0.167612	0.086121	-0.12278	0.542355	-0.348633	0.137552	0.237026	0.162388	0.551741	0.509498	0.503793	-0.066987	0.229217	0.880133	0.881176	0.553428
P. radiata	0.195011	-0.318756	-0.076325	0.069887	-0.185066	-0.180264	0.59266	0.269621	0.011579	0.48557	0.637174	0.620339	0.690601	0.584215	0.240441	0.434982	0.96461	0.826646	0.64472
P. sabiniana	0.046495	-0.182609	0.069792	0.117859	0.084982	-0.198233	0.598987	0.307846	0.121446	0.536273	-0.011765	0.53762	0.494677	0.308367	-0.206423	0.103711	0.957764	0.612554	0.307122
P. torreyana	0.092999	-0.215796	0.050367	0.030394	-0.069149	-0.113917	0.456943	0.295108	0.074859	0.57354	-0.06159	0.462269	0.499453	0.456191	0.078278	-0.134349	0.920111	0.653255	0.321846
